# Supplementary material for: Gasdermin-D activation promotes NLRP3 activation and host resistance to Leishmania infection
Source: Nat Commun. 2023 Feb 24;14:1049. doi: 10.1038/s41467-023-36626-6 (PMC9958042; doi:10.1038/s41467-023-36626-6)
Supplement: Supplementary file 1 — Supplementary information [file 41467_2023_36626_MOESM1_ESM.pdf]

**Gasdermin-D activation promotes NLRP3 activation and  
host resistance to *Leishmania* infection**

Keyla S.G. de Sá et al.

**Supplementary Figures 1-6 (pages 2-8):**

**Supplementary Table 1 (page 9):**

**Supplementary Table 2 (pages 10 and 11):**

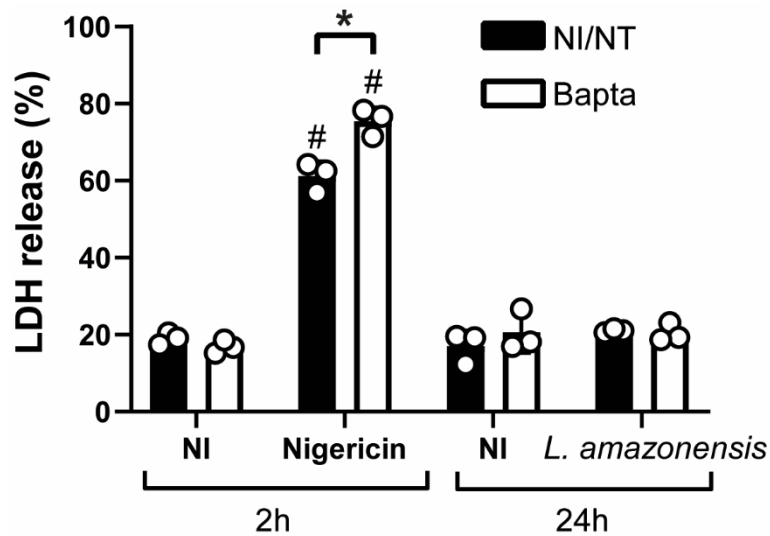

**Supplementary Fig. 1. BAPTA does not interfere with LDH release in *Leishmania*-infected macrophages.** Bone marrow-derived macrophages (BMDMs) from C57BL/6 mice were pretreated for 4h with LPS (100 ng/mL) and BAPTA (3 $\mu$ M) and infected with *L. amazonensis* at an MOI 10 or treated with Nigericin. LDH release was assessed 24h after infection with *Leishmania* and 2h after treatment with Nigericin using CytoTox 96 NonRadioactive Cytotoxicity Assay. Data are presented as mean values  $\pm$  SD of triplicate wells. #,  $P < 0.05$  compared with NI or NT cells; \*,  $P < 0.05$  comparing the indicated groups, as determined by the Two-way ANOVA test. Shown is one representative experiment of three independent experiments performed.

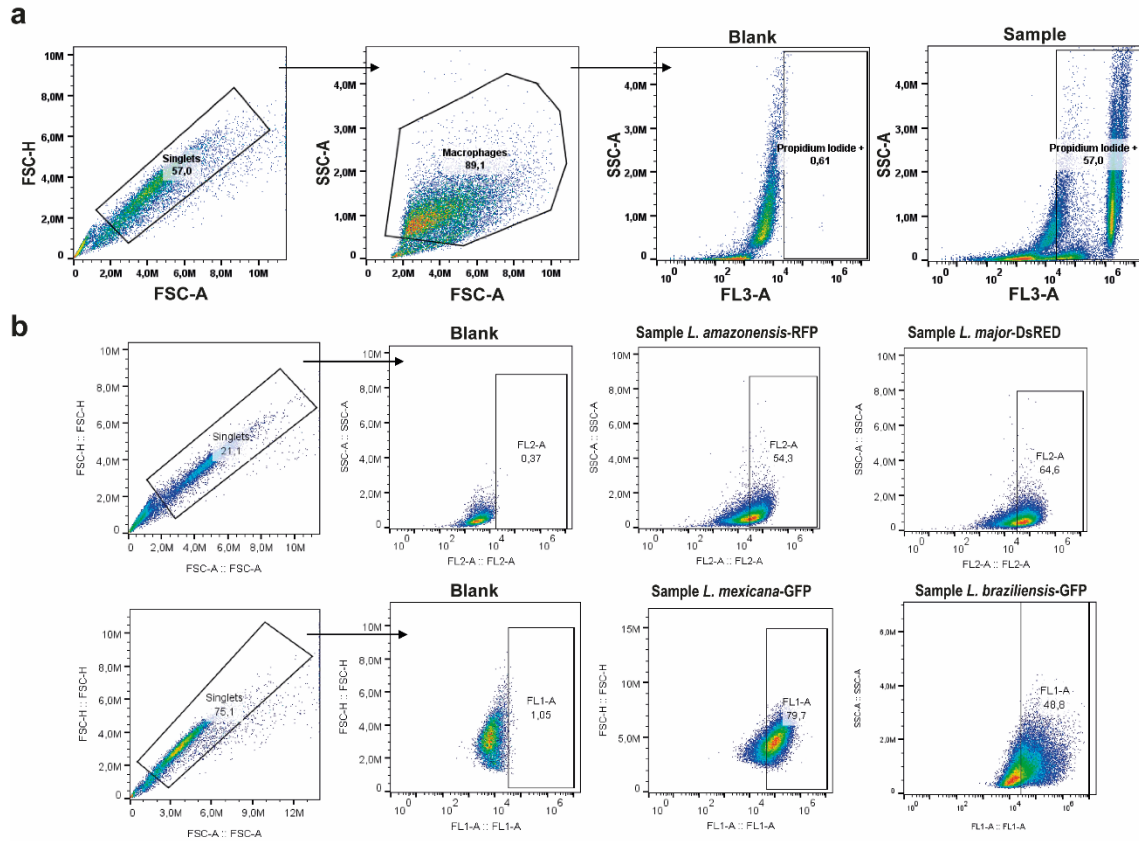

**Supplementary Fig. 2. Gating strategy for flow cytometry. (a)** Gating strategy for flow cytometer to analyze the PI uptake in *Leishmania*-infected cells. **(b)** Gating strategy for flow cytometer to analyze the *L. amazonensis*-RFP, *L. major* DsRED, *L. mexicana*-GFP and *L. braziliensis*-GFP replication.

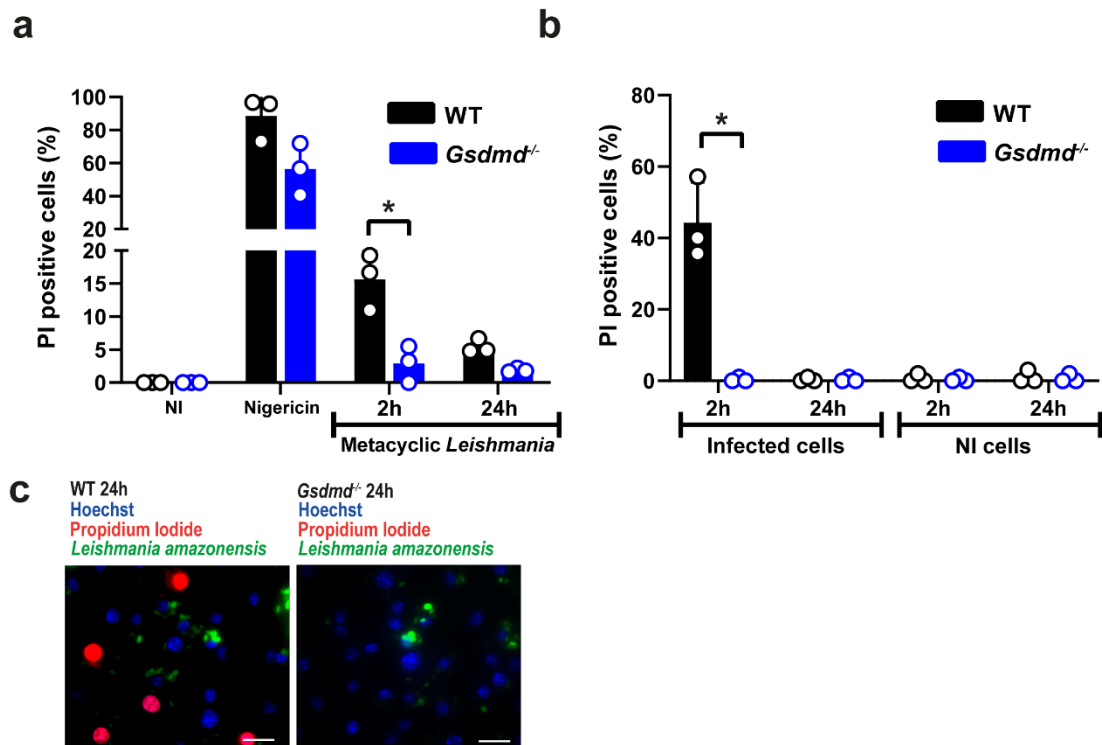

**Supplementary Fig. 3. Metacyclic promastigotes and axenic amastigotes of *L. amazonensis* induce GSDMD-dependent membrane permeabilization in macrophages.** Bone marrow-derived macrophages (BMDMs) adherent to glass coverslips was pretreated for 4h with Pam3Cys (100 ng/mL) and infected with GFP-expressing metacyclic *L. amazonensis* at an MOI 1 for 2h or 24h; the cultures were processed for pore formation assay by staining with propidium iodide (PI) and Hoechst. **(a)** The percentage BMDMs with PI incorporation after 2 and 24hs infection with *L. amazonensis*. **(b)** The percentage BMDMs with PI incorporation in infected and non-infected cells. A total of 100 cells in each triplicate well were analyzed. **(c)** Representative images of PI<sup>+</sup> cells (red), Hoechst (blue), and *Leishmania* (green). Images were acquired by fluorescence microscopy with a 100x oil immersion objective and analyzed using ImageJ software. Scale bar 20μm. Data are presented as mean values ± SD of triplicate wells. #,  $P < 0.05$  compared with NI cells, as determined by Two-way ANOVA.; \*,  $P < 0.05$  comparing the indicated groups, as determined by Two-way ANOVA. Shown is one representative experiment of five independent experiments performed.

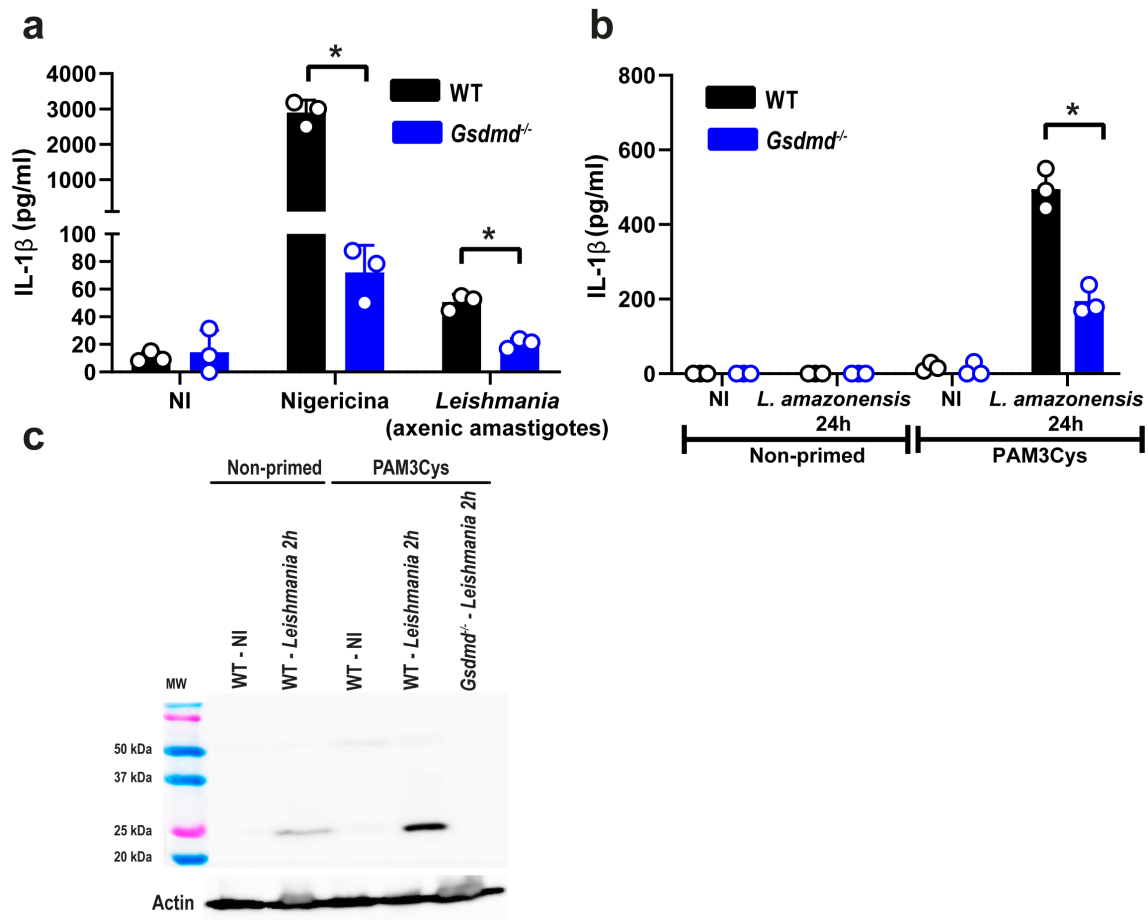

**Supplementary Fig. 4. Amastigotes and metacyclic forms of *L. amazonensis* induce GSDMD-dependent inflammasome activation when primed with Pam3Cys.** (a-b) Bone marrow-derived macrophages (BMDMs) from C57BL/6 (WT) and *Gsdmd*<sup>-/-</sup> mice were treated or not with Pam3Cys (100 ng/mL) for 4h, and infected with axenic amastigotes forms of *L. amazonensis* with an MOI 1 (a) or stationary phase promastigotes of *L. amazonensis* at an MOI of 10 (b) for 24 h. IL-1 $\beta$  production was measured by ELISA. Data are presented as mean values  $\pm$  SD of triplicate wells. (c) Lysates from WT and *Gsdmd*<sup>-/-</sup> BMDMs pretreated or not with Pam3Cys (100 ng/mL) for 4h were left non-infected (NI) or infected for 2h with *L. amazonensis* (stationary phase promastigotes, MOI 10). GSDMD cleavage was assessed by western blot using an anti-GSDMD antibody. Full-length (55 kDa) and cleaved (25 kDa) GSDMD are indicated in the figure. MW, Molecular Weight.

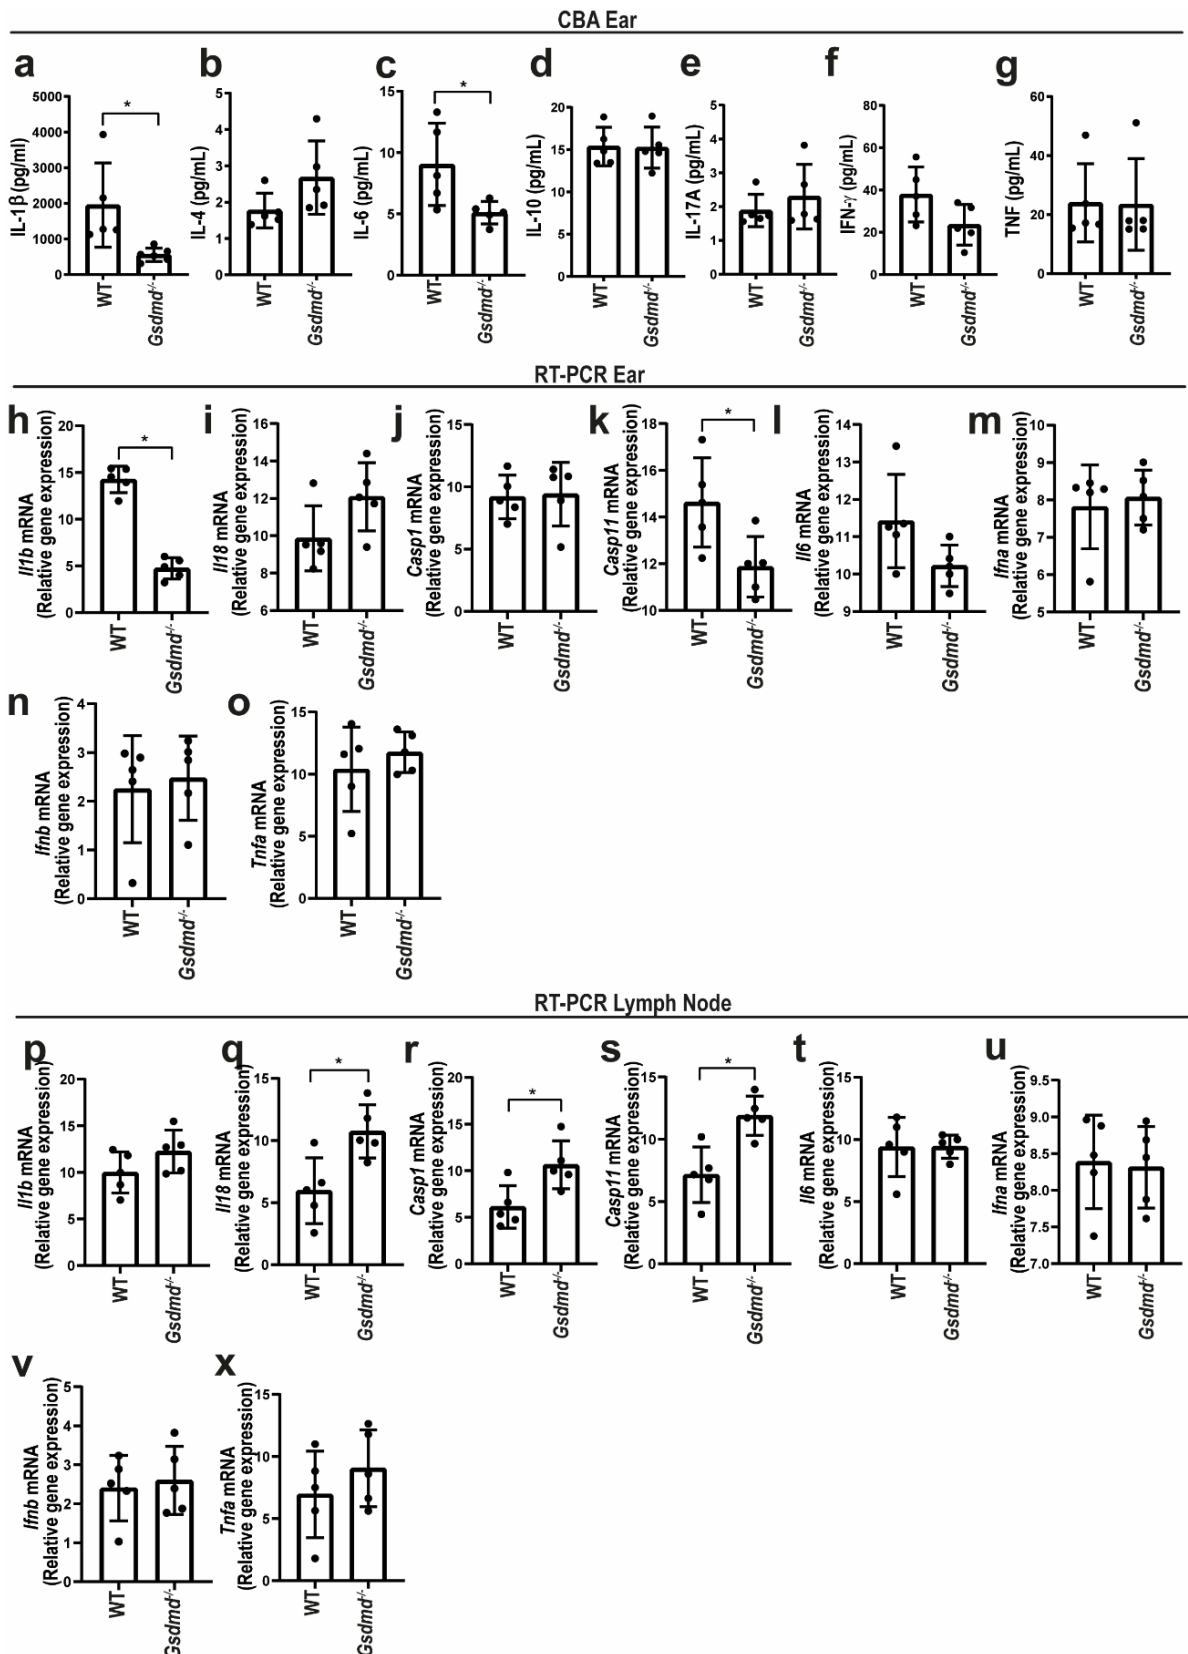

**Supplementary Fig. 5. Inflammatory cytokines expression in the ear and lymph nodes of WT and *Gsdmd*<sup>-/-</sup> mice infected with *L. amazonensis*. (a-g) Levels of**

cytokines (quantified by CBA) in the ears of mice intradermally infected with  $10^3$  metacyclic *L. amazonensis* for 15 weeks. Selected cytokines were IL-1 $\beta$  (**a**), IL-4 (**b**), IL-6 (**c**), IL-10 (**d**), IL-17A (**e**), IFN $\gamma$  (**f**) and TNF $\alpha$  (**g**). Expression of cytokines mRNA in the ears and lymph nodes of WT and *Gsdmd*<sup>-/-</sup> mice infected with  $10^3$  metacyclic *L. amazonensis* for 15 weeks. Selected genes were *Il1b* (**h**, **p**), *Il18* (**i**, **q**), *Casp1* (**j**, **r**), *Casp11* (**k**, **s**), *Il6* (**l**, **t**), *Ifna* (**m**, **u**), *Ifnb* (**n**, **v**), *Tnfa* (**o**, **x**). Data are presented as mean values  $\pm$  SD.

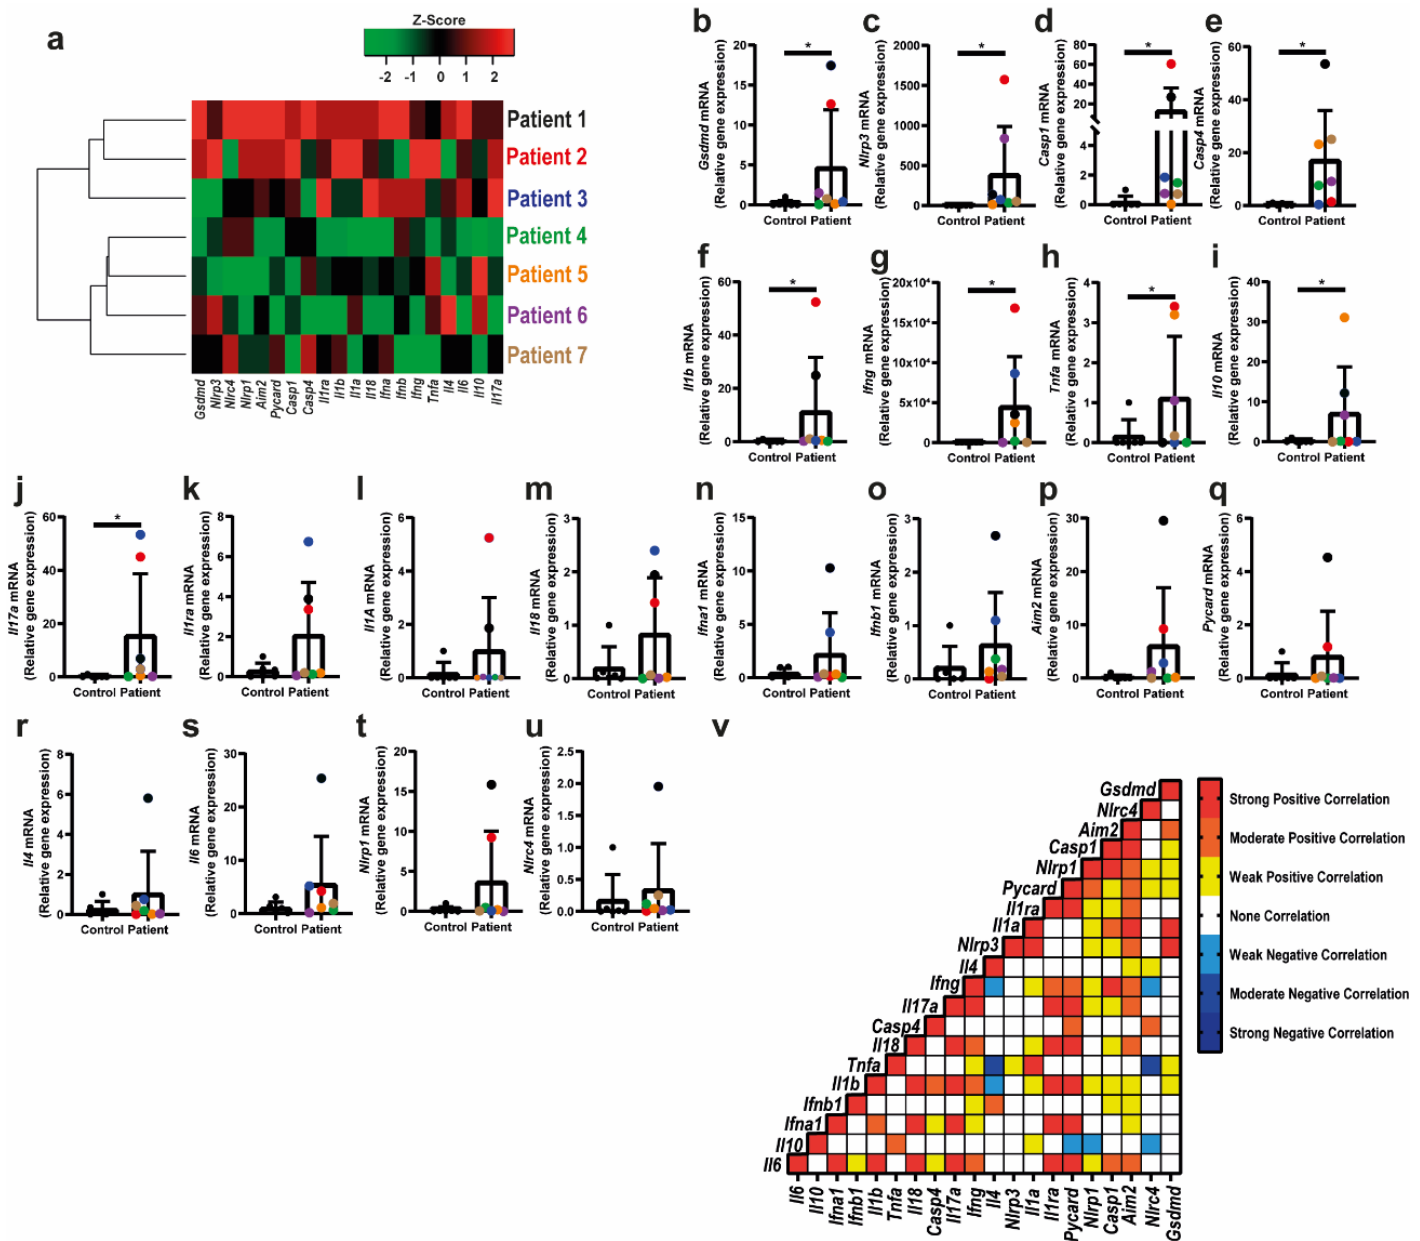

**Supplementary Fig. 6. Inflammasome and inflammatory cytokines expression in skin biopsies of patients with cutaneous leishmaniasis.** (a) Heatmap of the mRNA expression of inflammasome, inflammatory molecules, and cytokine in skin biopsies of 7 patients with cutaneous leishmaniasis. (b-u) Expression of mRNA in the skin biopsies of cutaneous leishmaniasis and healthy controls (skin of individuals who underwent reductive mastectomy). Selected genes were *Gsdmd* (b), *Nlrp3* (c), *Casp1* (d), *Casp4* (e), *Il1b* (f), *Ifng* (g), *Tnfa* (h), *Il10* (i), *Il17a* (j), *Il1ra* (k), *Il1a* (l), *Il18* (m), *Ifna1* (n), *Ifnb1* (o), *Aim2* (p), *Asc* (q), *Il4* (r), *Il6* (s), *Nlrp1* (t), *Nlr4* (u). Data are presented as mean values  $\pm$  SD. Correlation matrix of inflammasome gene expression in skin lesion biopsies of patients with cutaneous leishmaniasis (v).

**Supplementary Table 1.** Leishmaniasis patients' characteristics

| <b>Demographics Characteristics</b>                    | <b>Leishmaniasis patients</b><br>Mean ( $\pm$ SD) or n(%) |
|--------------------------------------------------------|-----------------------------------------------------------|
| N                                                      | 7                                                         |
| Age (years)                                            | 52.75 ( $\pm$ 12.45)                                      |
| Sex                                                    |                                                           |
| Male                                                   | 6 (85.71%)                                                |
| Female                                                 | 1 (14.28%)                                                |
| <i>L. braziliensis</i> strain                          | 7 (100.00%)                                               |
| <b>Treatment</b>                                       |                                                           |
| Glucantine                                             | 4 (57.14%)                                                |
| Pentamidina                                            | 1 (14.28%)                                                |
| Liposomal Amphotericin B + Glucantine                  | 1 (14.28%)                                                |
| Miltefosine + Conventional Amphotericin B + Glucantine | 1 (14.28%)                                                |
| <b>Laboratorial findings</b>                           |                                                           |
| Montenegro skin test                                   |                                                           |
| Positive                                               | 2 (28.57%)                                                |
| Negative                                               | 2 (28.57%)                                                |
| Unperformed                                            | 3 (42.85%)                                                |
| HIV positive                                           | 1 (14.28%)                                                |
| HIV negative                                           | 6 (85.71%)                                                |
| Hemoglobin (g/dL)                                      | 13.05 ( $\pm$ 2.56)                                       |
| White blood cells ( $10^3$ /ul)                        | 5.76 ( $\pm$ 2.57)                                        |
| Neutrophil (%)                                         | 49.35 ( $\pm$ 7.97)                                       |
| Lymphocytes (%)                                        | 37.73 ( $\pm$ 6.96)                                       |
| Monocyte (%)                                           | 7.58 ( $\pm$ 1.84)                                        |
| ALT (IU/L)                                             | 32.51 ( $\pm$ 17.42)                                      |
| AST (IU/L)                                             | 34.16 ( $\pm$ 9.71)                                       |
| Alkaline phosphatase (U/L)                             | 232.09 ( $\pm$ 126.18)                                    |
| Cholesterol (mg/dL)                                    | 170.23 ( $\pm$ 43.96)                                     |
| Blood glucose (mg/dL)                                  | 122.46 ( $\pm$ 34.64)                                     |
| Creatinine (mg/dL)                                     | 1.04 ( $\pm$ 0.32)                                        |
| Urea (mg/dL)                                           | 26.88 ( $\pm$ 17.43)                                      |
| <b>Histopathological findings</b>                      |                                                           |
| Lesion size (cm)                                       | 6 ( $\pm$ 2.94)                                           |
| Inflammatory infiltrate                                | 7 (100.00%)                                               |
| Acanthosis                                             | 5 (71.42%)                                                |
| Compact hyperkeratosis                                 | 2 (28.57%)                                                |
| Spongiosis                                             | 2 (28.57%)                                                |
| Ulcerated epidermis                                    | 4 (57.14%)                                                |
| Amastigotes                                            | 5 (71.42%)                                                |

**Supplementary Table 2.** The list of primer sequences for real-time PCR

| Gene                   | Sequence of primer (5'- 3')  |
|------------------------|------------------------------|
| Human <i>Gsdmd</i>     | F: ATGAGGTGCCTCCACAACCTTCC   |
|                        | R: CCAGTTCCTTGGAGATGGTCTC    |
| Human <i>Nlrp3</i>     | F: GGAAGTGAAGCACCTGTTGTGCA   |
|                        | R: TCCTGAGTCTCCCAAGGCATTC    |
| Human <i>Il1a</i>      | F: TGTATGTGACTGCCCCAAGATGAAG |
|                        | R: AGAGGAGGTTGGTCTCACTACC    |
| Human <i>Il1ra</i>     | F: ATGGAGGGAAGATGTGCCTGTC    |
|                        | R: GTCCTGCTTTCTGTTCTCGCTC    |
| Human <i>Nlrc4</i>     | F: AGGTCCCACAACCTCGTCAAGCT   |
|                        | R: TGCTCACACGATTTCCCGCCAA    |
| Human <i>Pycard</i>    | F: AGCTCACCGCTAACGTGCTGC     |
|                        | R: GCTTGGCTGCCGACTGAGGAG     |
| Human <i>Nlrp1</i>     | F: ATTGAGGGCAGGCAGCACAGAT    |
|                        | R: CTCCTTCAGGTTTCTGGTGACC    |
| Human <i>Casp1</i>     | F: GCTGAGGTTGACATCACAGGCA    |
|                        | R: TGCTGTCAGAGGTCTTGTGCTC    |
| Human <i>Aim2</i>      | F: GCTGCACCAAAAGTCTCTCCTC    |
|                        | R: CTGCTTGCCCTTCTTGGGTCTCA   |
| Human <i>Il6</i>       | F: AGACAGCCACTCACCTCTTCAG    |
|                        | R: TTCTGCCAGTGCCTCTTTGCTG    |
| Human <i>Gapdh</i>     | F: GTCTCCTCTGACTTCAACAGCG    |
|                        | R: ACCACCCTGTTGCTGTAGCCAA    |
| Human <i>Tnf Alpha</i> | F: CTCTTCTGCCTGCTGCACTTTG    |
|                        | R: ATGGGCTACAGGCTTGTCACTC    |
| Human <i>Il10</i>      | F: TCTCCGAGATGCCTTCAGCAGA    |
|                        | R: TCAGACAAGGCTTGGCAACCCA    |
| Human <i>Il1b</i>      | F: CCACAGACCTTCCAGGAGAATG    |
|                        | R: GTGCAGTTCAGTGATCGTACAGG   |
| Human <i>Il18</i>      | F: GATAGCCAGCCTAGAGGTATGG    |
|                        | R: CCTTGATGTTATCAGGAGGATTCA  |
| Human <i>Casp4</i>     | F: GGGATGAAGGAGCTACTTGAGG    |
|                        | R: CCAAGAATGTGCTGTCAGAGGAC   |
| Human <i>Il17a</i>     | F: CGGACTGTGATGGTCAACCTGA    |
|                        | R: GCACTTTGCCTCCCAGATCACA    |
| Human <i>Ifng</i>      | F: GAGTGTGGAGACCATCAAGGAAG   |
|                        | R: TGCTTTGCGTTGGACATTCAAGTC  |
| Human <i>Ifnb1</i>     | F: CTTGGATTCTTACAAAGAAGCAGC  |
|                        | R: TCCTCCTTCTGGAAGTCTGCTGCA  |
| Human <i>Ifna1</i>     | F: AGAAGGCTCCAGCCATCTCTGT    |
|                        | R: TGCTGGTAGAGTTCGGTGCAGA    |
| Human <i>Il4</i>       | F: CCGTAACAGACATCTTTGCTGCC   |
|                        | R: GAGTGTCTTCTCATGGTGGCT     |
| Mouse <i>Il1b</i>      | F: TGGACCTTCCAGGATGAGGACA    |
|                        | R: GTTCATCTCGGAGCCTGTAGTG    |

|                     |                            |
|---------------------|----------------------------|
| Mouse <i>Il18</i>   | F: GACAGCCTGTGTTCGAGGATATG |
|                     | R: TGTTCTTACAGGAGAGGGTAGAC |
| Mouse <i>Casp1</i>  | F: GGCACATTTCCAGGACTGACTG  |
|                     | R: GCAAGACGTGTACGAGTGGTTG  |
| Mouse <i>Casp11</i> | F: GTGGTGAAAGAGGAGCTTACAGC |
|                     | R: GCACCAGGAATGTGCTGTCTGA  |
| Mouse <i>Il6</i>    | F: TACCACTTCACAAGTCGGAGGC  |
|                     | R: CTGCAAGTGCATCATCGTTGTTC |
| Mouse <i>Ifna1</i>  | F: GGATGTGACCTTCCTCAGACTC  |
|                     | R: ACCTTCTCCTGCGGGAATCCAA  |
| Mouse <i>Ifnb1</i>  | F: GCCTTTGCCATCCAAGAGATGC  |
|                     | R: AACTGTCTGCTGGTGGAGTTC   |
| Mouse <i>Tnfa</i>   | F: GGTGCCTATGTCTCAGCCTCTT  |
|                     | R: GCCATAGAACTGATGAGAGGGAG |
| Mouse <i>Gapdh</i>  | F: CATCACTGCCACCCAGAAGACTG |
|                     | R: ATGCCAGTGAGCTTCCCGTTCAG |
